# Supplementary material
Source: PubMed Central journal article supplement (PMC2651286)
Supplement: 0812952106_0812952106SI.pdf [file 0812952106_0812952106SI.pdf]

# Supporting Information

Gao *et al.* 10.1073/pnas.0812952106

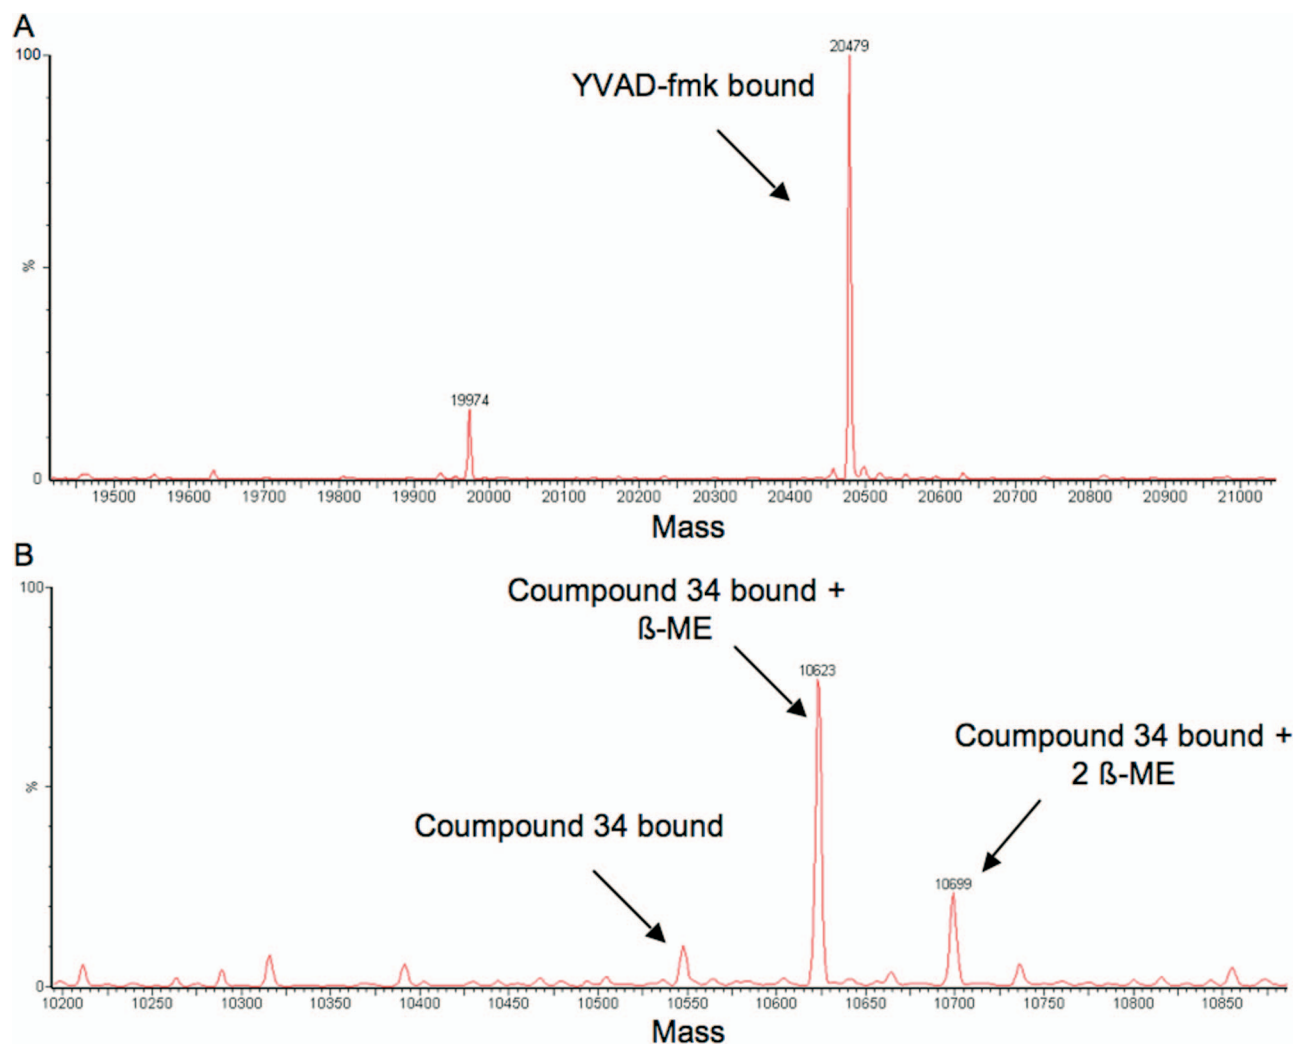

**Fig. S1.** Mass spectrometry results of labeling caspase-1 with the active inhibitor Ac-YVAD-cmk (A) and the allosteric compound 34 (B). Either inhibitor was incubated with caspase-1 at 4°C overnight before analyzed on LC-MS.





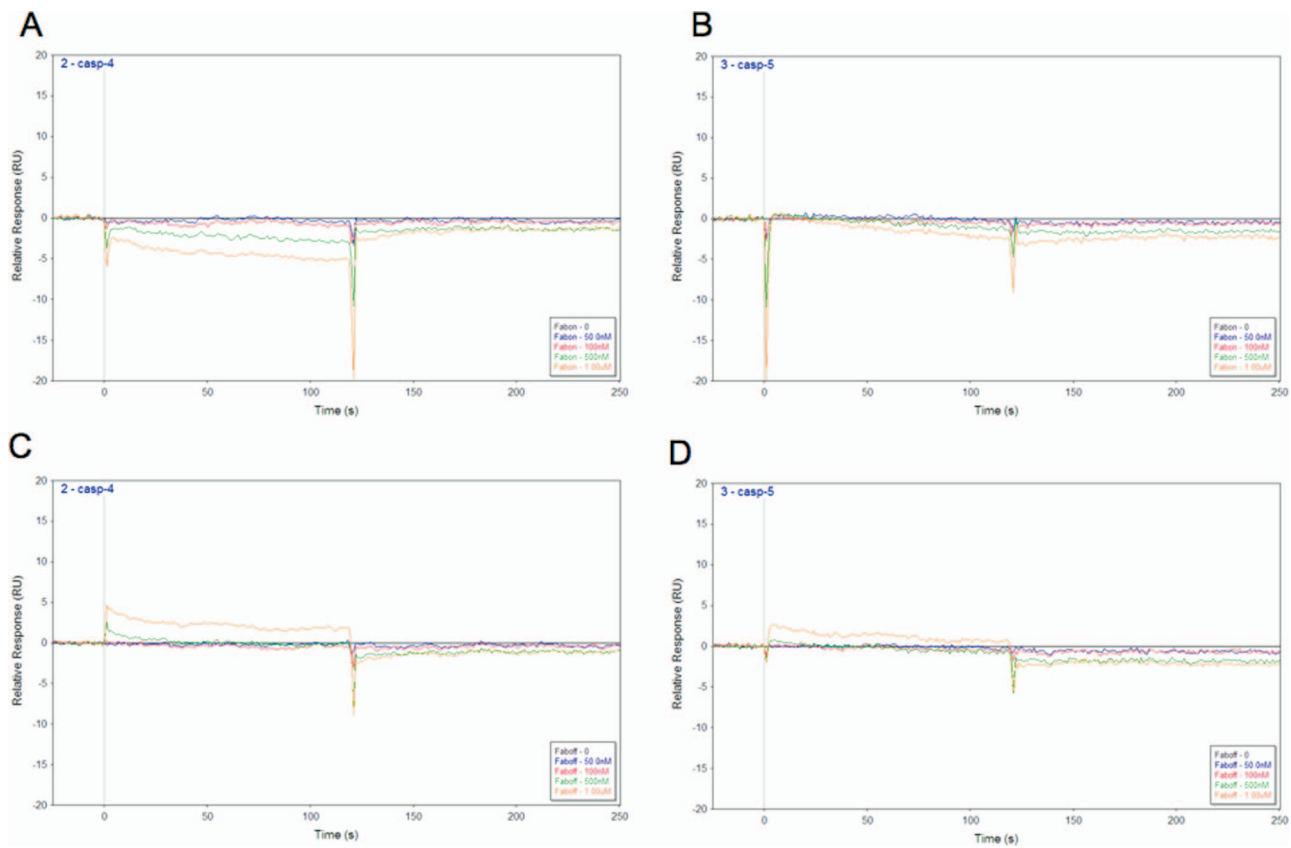

**Fig. S4.** SPR analysis of Fabs binding to caspase-4 and -5. Caspase-4 and -5 were immobilized on the CM5 chip and Fabs at 5 different concentrations (0, 50, 100, 500, and 1,000 nM) were injected to measure the binding. Data were processed using program Scrubber-2 (D. Myszka, University of Utah).

## Other Supporting Information Files

[Table S1 \(PDF\)](#)
