# Supplementary material
Source: PubMed Central journal article supplement (PMC2651286)
Supplement: 0812952106_ST1_PDF.pdf [file 0812952106_ST1_PDF.pdf]

|                  |                  | CDR-H1 |    |    |    |    |    | CDR-H2 |    |    |   |    |    | CDR-H3 |    |    |    |    |    | IC50<br>(nM) |    |    |    |     |   |      |                |   |   |            |
|------------------|------------------|--------|----|----|----|----|----|--------|----|----|---|----|----|--------|----|----|----|----|----|--------------|----|----|----|-----|---|------|----------------|---|---|------------|
|                  |                  | 28     | 29 | 30 | 31 | 32 | 33 | 50     | 51 | 52 | a | 53 | 54 | 55     | 56 | 57 | 58 | 95 | 96 |              | 97 | 98 | 99 | 100 | a | b    | c              |   |   |            |
| Fab <sub>1</sub> | N                | S      | F  | S  | Y  | Y  | S  | S      | I  | S  | S | Y  | S  | S      | S  | T  | S  | G  | Y  | Y            | Y  | I  |    |     | G | M    | <b>50</b>      |   |   |            |
|                  | S                | I      | Y  | Y  | S  | S  | S  | S      | I  | S  | P | Y  | S  | G      | S  | T  | S  | R  | Y  | Y            | Y  | Y  | Y  |     | A | I    | 89             |   |   |            |
|                  | S                | I      | F  | Y  | S  | S  | S  | Y      | I  | S  | P | Y  | S  | G      | S  | T  | Y  | R  | C  | Y            | Y  | Y  | Y  |     | G | I    | 94             |   |   |            |
|                  | S                | I      | Y  | Y  | S  | S  | S  | S      | I  | S  | P | Y  | S  | G      | Y  | T  | S  | R  | Y  | Y            | Y  | Y  | Y  |     | A | I    | <b>50</b>      |   |   |            |
|                  | Y                | I      | Y  | Y  | S  | S  | S  | S      | I  | S  | P | Y  | S  | G      | S  | T  | Y  | R  | Y  | Y            | S  | R  | Y  |     | A | I    | 200            |   |   |            |
|                  | Y                | I      | Y  | Y  | S  | S  | S  | S      | I  | S  | P | Y  | S  | G      | S  | T  | S  | R  | Y  | Y            | Y  | T  | R  |     | G | M    | 95             |   |   |            |
|                  | S                | I      | Y  | Y  | S  | S  | S  | S      | I  | S  | P | Y  | S  | G      | S  | T  | Y  | R  | Y  | Y            | Y  | Y  | R  |     | A | I    | 127            |   |   |            |
|                  | S                | I      | Y  | Y  | S  | S  | S  | S      | I  | S  | P | Y  | S  | G      | S  | T  | Y  | R  | G  | Y            | Y  | Y  | Y  |     | G | I    | 81             |   |   |            |
|                  | S                | I      | S  | Y  | S  | S  | S  | S      | I  | S  | P | Y  | S  | G      | Y  | T  | Y  | R  | S  | Y            | Y  | T  | Y  |     | G | I    | 122            |   |   |            |
|                  | S                | I      | S  | Y  | S  | S  | S  | S      | I  | S  | P | Y  | S  | G      | S  | T  | Y  | R  | S  | Y            | Y  | R  | Y  |     | A | I    | 122            |   |   |            |
|                  | S                | I      | Y  | Y  | S  | S  | S  | S      | I  | S  | P | Y  | S  | G      | S  | T  | S  | R  | S  | Y            | Y  | Y  | Y  |     | G | I    | 166            |   |   |            |
|                  | S                | I      | S  | S  | S  | Y  | Y  | Y      | I  | Y  | P | Y  | S  | G      | S  | T  | Y  | S  | S  | Y            | R  | Y  | S  | R   | R | Y    | Y              | G | M | 130        |
|                  | S                | I      | S  | F  | S  | Y  | Y  | Y      | I  | Y  | P | Y  | S  | G      | S  | T  | Y  | S  | S  | Y            | R  | Y  | S  | R   | R | Y    | Y              | G | M | <b>110</b> |
|                  | N                | F      | Y  | S  | S  | Y  | Y  | S      | I  | S  | S | S  | S  | G      | Y  | T  | S  | D  | H  | Y            | S  | M  | F  | S   | F | W    | S              | A | I | <b>89</b>  |
|                  | Fab <sub>2</sub> | S      | I  | Y  | S  | S  | S  | S      | I  | S  | P | Y  | Y  | G      | Y  | T  | S  | Y  | S  | S            | Y  | S  | Y  | Y   | A | F    | <b>&gt;500</b> |   |   |            |
| Y                |                  | I      | Y  | Y  | S  | S  | S  | I      | S  | P  | S | Y  | G  | Y      | T  | S  | Y  | S  | S  | Y            | S  | Y  | Y  | A   | F | >500 |                |   |   |            |
| Y                |                  | I      | S  | Y  | S  | S  | S  | I      | S  | P  | Y | Y  | G  | Y      | T  | S  | Y  | S  | S  | Y            | Y  | Y  | Y  | A   | I | >500 |                |   |   |            |
| Y                |                  | I      | Y  | S  | S  | S  | S  | I      | S  | P  | Y | Y  | G  | Y      | T  | S  | Y  | S  | S  | Y            | Y  | Y  | Y  | G   | F | >500 |                |   |   |            |
